# Supplementary material for: Targeting intracellular LMP2 with costimulatory signal–armed antibody-like TCR T cells
Source: JCI journal article supplement (doi:10.1172/jci.insight.178572), 2025-05-21
Supplement: sd1 [file 1]

# Supplementary Materials

1

## 2 Supplementary figures and legends:

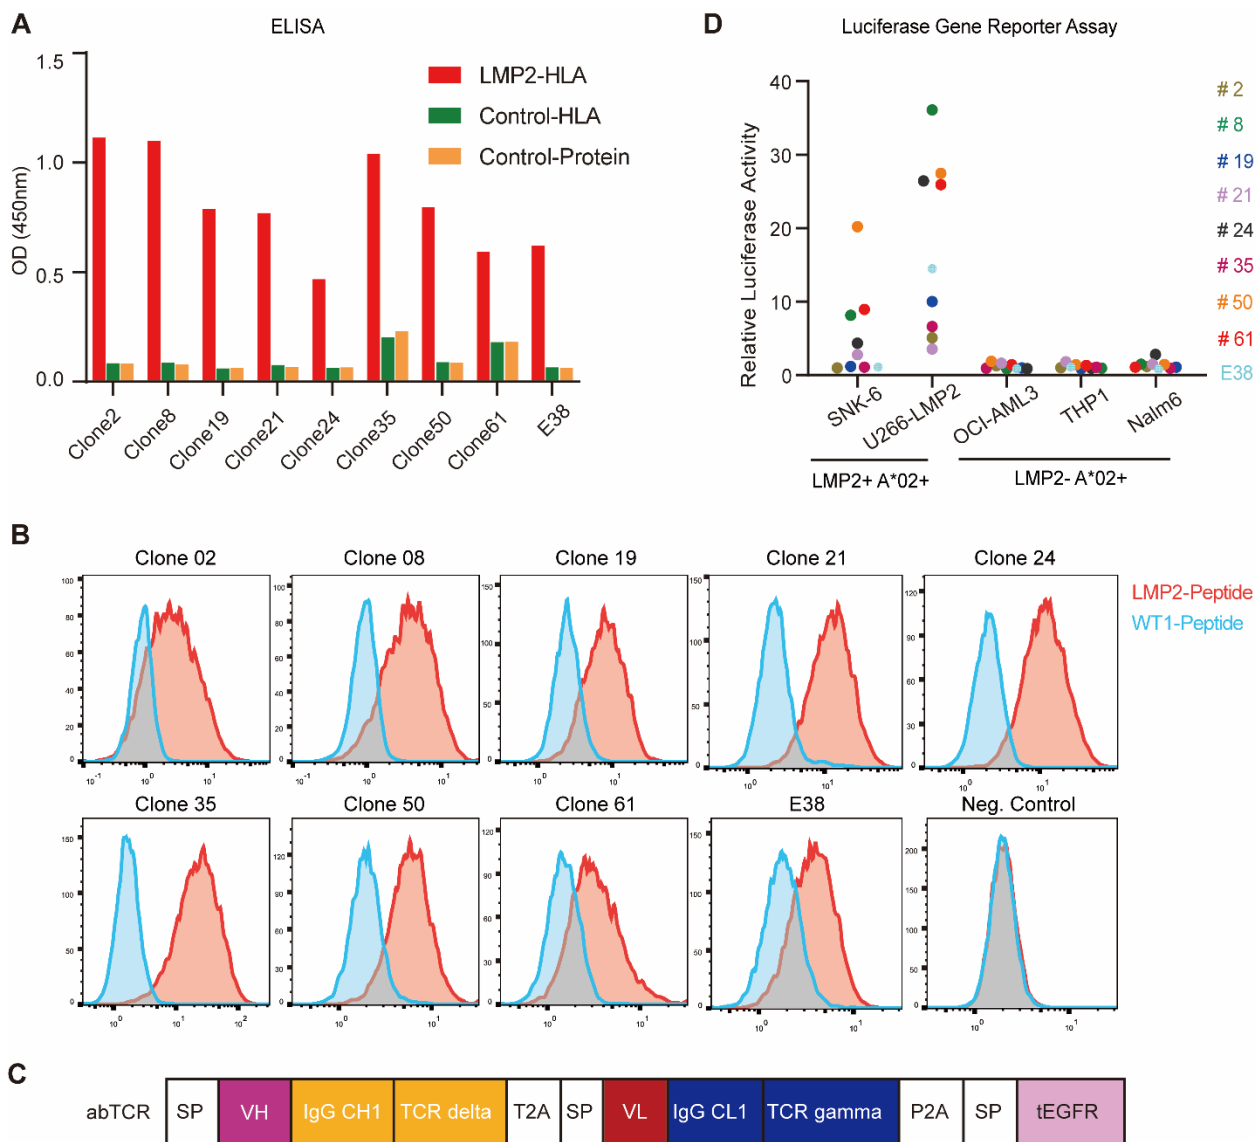

3

## 4 Supplementary Figure 1. Screening of pHLA (A\*02/LMP2<sub>426</sub>)-specific binder from phage

5 library. (A) Binding of 8 candidate phage clones to HLA-A\*02/LMP2<sub>426</sub> (Red), HLA-A\*02/WT1

6 (Green), and TNF- $\alpha$  (Yellow) by ELISA (n = 1). (B) Binding of 8 candidate phage clones to T2

7 pulsed with LMP2<sub>426</sub> peptides (Red), WT1 peptides (Blue) by flow cytometry. Previously

8 validated negative phage clones were used as negative control. (n = 1). (C) Schematic construct of  
9 the transfer plasmid of abTCR. VH/VL, the variable domain of heavy chain/ light chain. IGHC1/  
10 IGLC1, the constant domain 1 of the heavy chain/ light chain of IgG. TRDC/ TRGC, the  
11 transmembrane and intracellular domains of the delta/ gamma chain of TCR. The two chains, *VH-*  
12 *IGHC1-TRDC* and *VL-IGLC1-TRGC*, are connected by T2A (self-cleaving 2A peptide). tEGFR is  
13 incorporated following a SP (signaling peptide) and P2A (another self-cleaving 2A peptide). (D)  
14 Luciferase reporter gene assay of the 8 candidate abTCRs in response to different target cells,  
15 SNK6, U266-LMP2, OCI-AML3, THP1 and Nalm6. Relative luciferase activity was obtained by  
16 dividing the value for the buffer group, 3 parallel repeats were set and the average value was plotted.

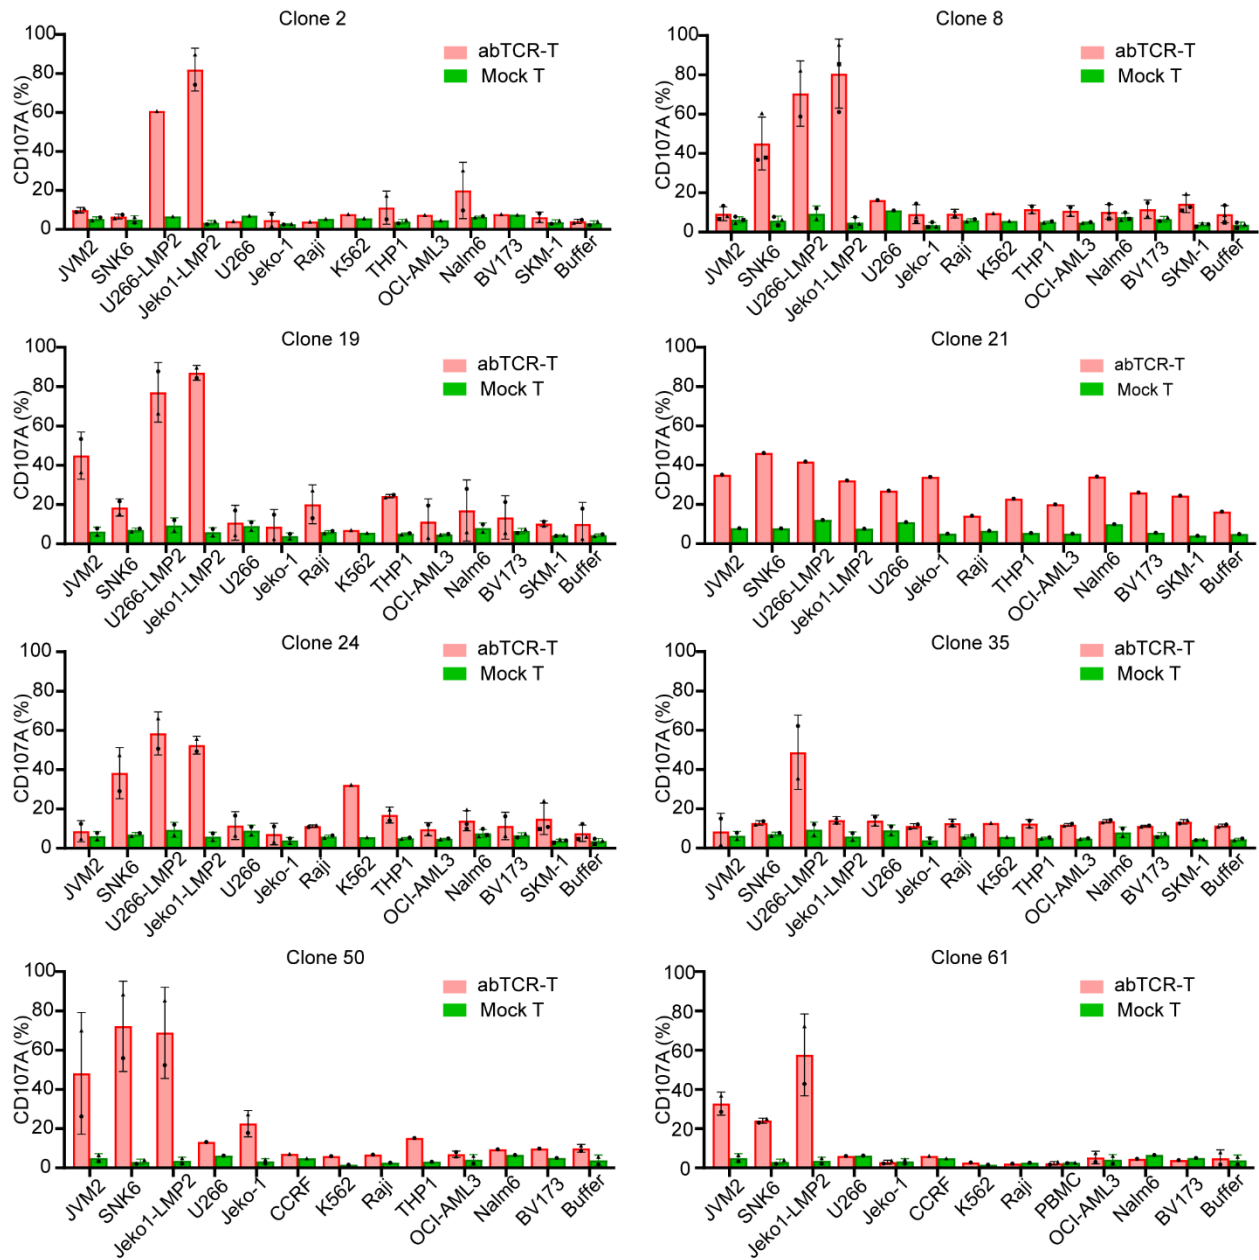

17

18 **Supplementary Figure 2. Evaluation of candidate clones in abTCR T-cell level by CD107A**

19 **assay.** CD107A expression in CD8<sup>+</sup>abTCR<sup>+</sup> T cells cloned from the 8 candidates after overnight

20 stimulation with various target positive cells and target negative cells (n = 1~3).

21

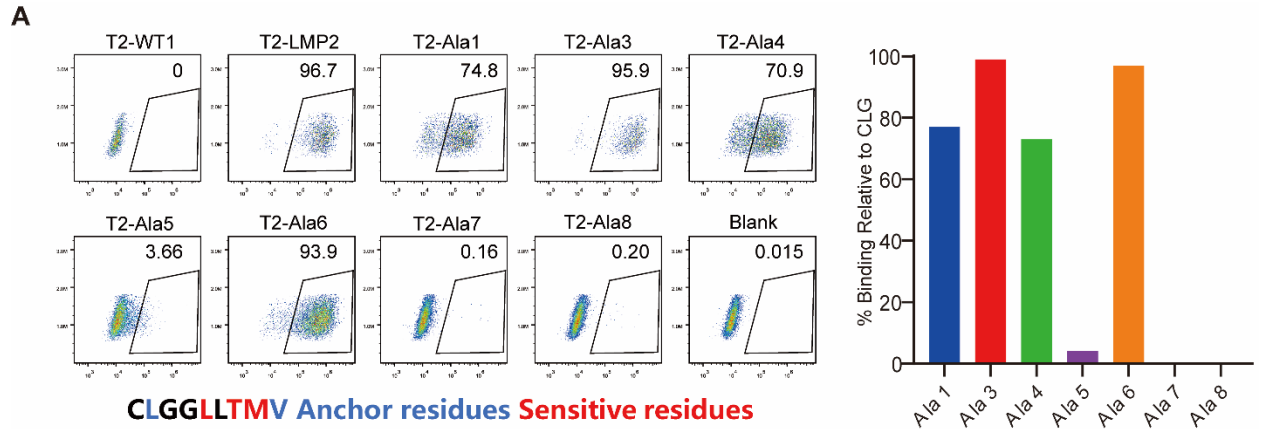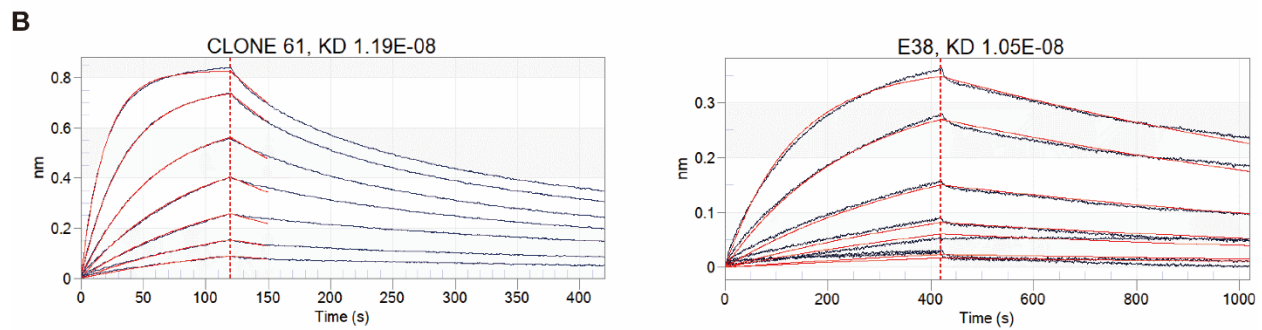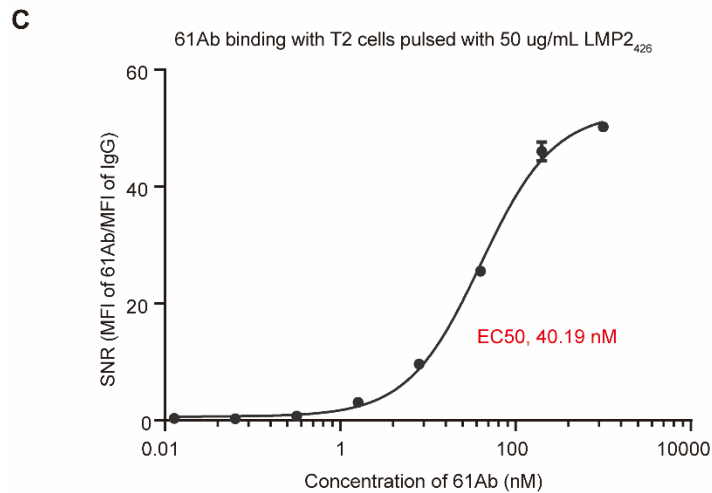

22

23 **Supplementary Figure 3. Biochemical characteristics of 61rFc.** (A) Binding of 61 clone  
 24 chimeric Ab with rabbit IgG (61rFc) to T2 pulsed with alanine-substituted LMP2<sub>426</sub> peptide. The  
 25 X-axis of the dot plot represented signal from APC-anti-rabbit IgG. Mutations in anchor residues,  
 26 specifically at position 2 and 9, hinders the formation of pHLA complex. Sensitive residues to  
 27 61rFc are found at position 5, 7 and 8. Position 1 and 4 might also participate in the interaction

28 with 61rFc (n = 1). **(B)** Binding affinity of 61rFc (11.9 nM) and E38-rFc (10.9 nM) to pHLA  
 29 (A\*02/LMP2<sub>426</sub>) by Biolayer Interferometry. **(C)** The binding of different concentration of 61rFc  
 30 to T2-pulsed with 50 µg/mL LMP2<sub>426</sub> by flow cytometry. signal-to-noise ratio (SNR) was  
 31 calculated from the median fluorescent intensity (MFI) of 61rFc group divided by MFI of IgG  
 32 group. n = 3. Mean ± SD (standard deviation) and nonlinear fit of curve were plotted.

33

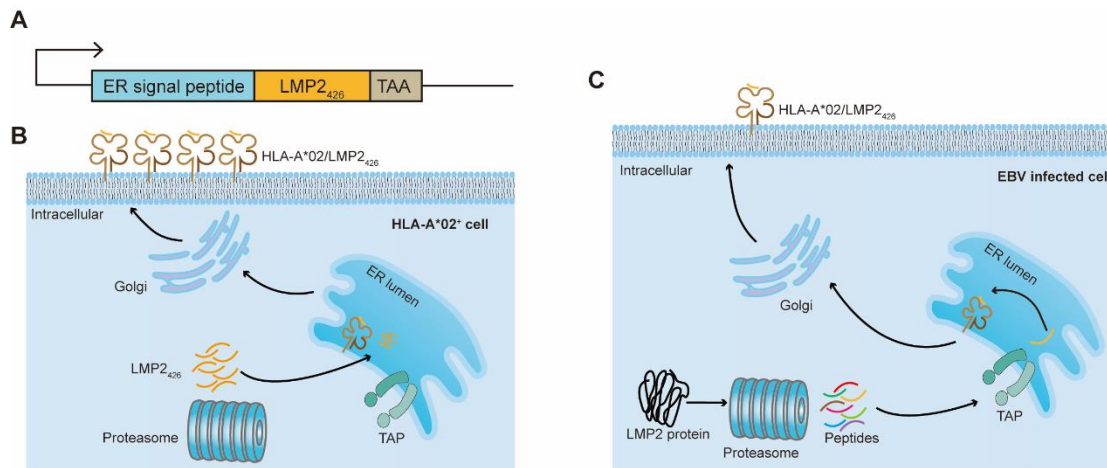

34

35 **Supplementary Figure 4. Antigen presented artificially by the PresentER method and**  
 36 **naturally by the endogenous procedures. (A)** Schematic construct of the PresentER Minigene.  
 37 **(B)** Schematic diagram of the working process of the PresentER method. A\*02 positive cells are  
 38 transduced with the lentivirus-encoded the LMP2<sub>426</sub> PresentER minigenes. The over-expressed  
 39 LMP2<sub>426</sub> peptides can directly enter the endoplasmic reticulum (ER) lumen and noncovalently  
 40 bind to A\*02, bypassing degradation by the proteasome, and transportation by the transporter  
 41 associated with antigen processing (TAP) complex to the ER. The assembled A02/LMP2 complex  
 42 is then translocated into the cell membrane through Golgi. **C,** Schematic diagram of the  
 43 endogenous antigen presenting process. In EBV-latency-II/III infected cells, the virus encoding  
 44 LMP2 protein is first degraded by proteasome, and the produced peptides are then delivered into

45 the ER lumen through TAP complex. The LMP2<sub>426</sub> peptides are loaded into HLA-A\*02:01 by  
 46 peptide loading complex to form the A\*02/LMP2 complex, and then transported to the cell  
 47 membrane through the Golgi.

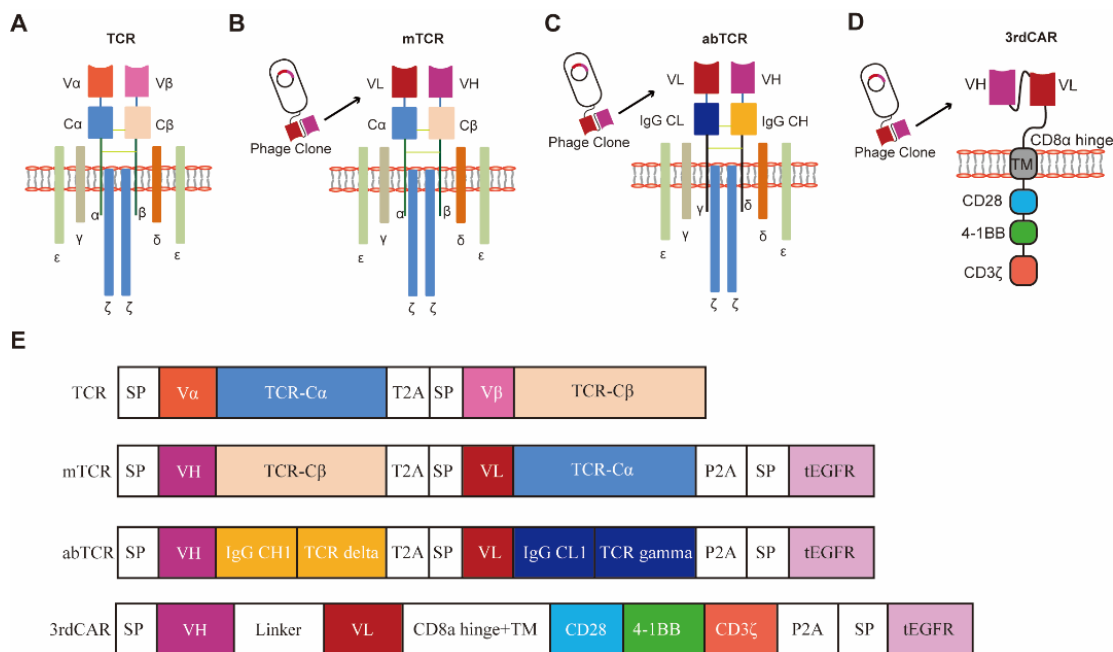

48

49 **Supplementary Figure 5.** The schematic structure of natural  $\alpha\beta$ TCR (A), mimic TCR (B), abTCR  
 50 (C) and third generation CAR T-cell (D). mTCR and abTCR are comprised of two chains. VH and  
 51 VL (variable domain of heavy and light chain of antibody) form the binding domain to  
 52 A\*02/LMP2<sub>426</sub>. In the mTCR, the constant regions, transmembrane domains and intracellular  
 53 domains are the same with  $\alpha\beta$ TCR. In the abTCR, the constant regions are from the constant  
 54 domain of light chain (IgG CL) and heavy chain (IgG CH) of IgG antibody, respectively. The  
 55 transmembrane and intracellular domain are the same with the corresponding region of  $\gamma$  and  $\delta$   
 56 TCR. The 3rdCAR is a single chain format. TM, transmembrane domain, CD28 and 4-1BB,  
 57 costimulatory domains, CD3 $\zeta$ , activation domain. The corresponding transfer plasmid constructs  
 58 (E). **mTCR or abTCR.** The two chains of mTCR or abTCR are connected by T2A within the

59 same transfer plasmid. A tEGFR is also included in the plasmid, connected by P2A following  
 60 the mTCR or abTCR structure. **3rdCAR.** The following components: VL, linker (2 x G4S repeat),  
 61 VH, CD8 $\alpha$  hinge and CD8 $\alpha$  transmembrane domain, CD28 co-stimulatory domain, the 4-1BB co-  
 62 stimulatory domain, and the CD3  $\zeta$  domain are connected directly. A truncated EGFR (tEGFR) is  
 63 included at the end, connected by P2A sequence.

64

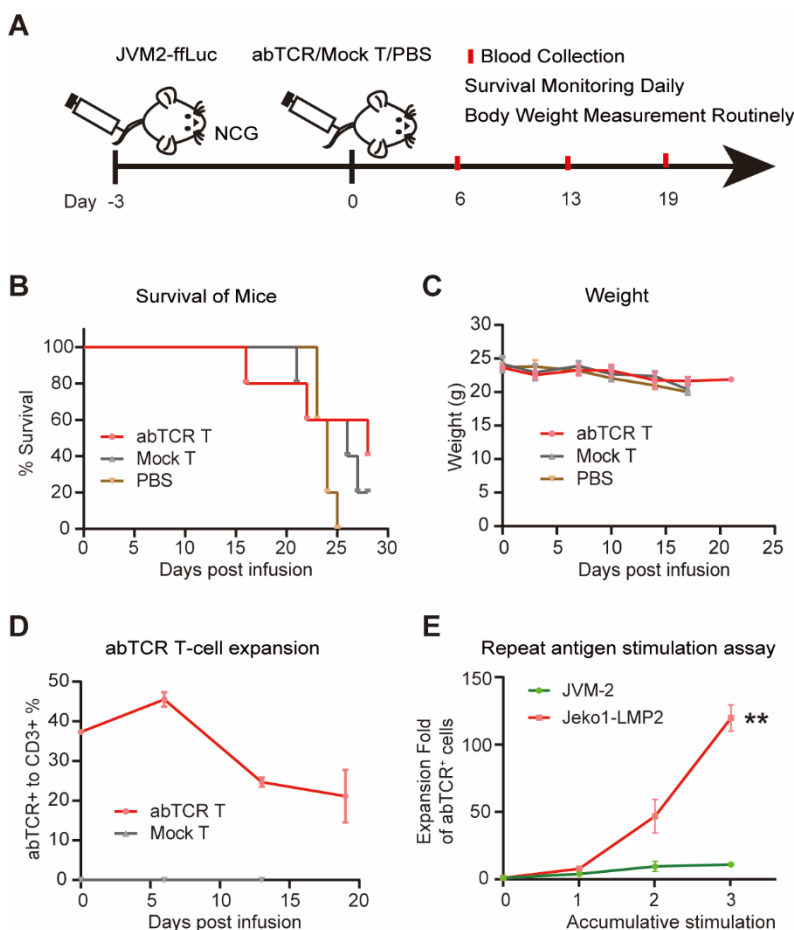

65

66 **Supplementary Figure 6. The evaluation of abTCR T-cells in JVM2 xenograft NCG mice.**

67 **(A)** The animal experimental design: NCG mice intravenously engrafted with  $2 \times 10^6$  JVM2 cells  
 68 at day -3, and treated with  $4 \times 10^6$  abTCR T-cells, mock T-cells or PBS. The survival and weight  
 69 of mice was recorded. The expansion of abTCR<sup>+</sup> cells was measured weekly. **(B)** The survival of  
 70 mice in different groups (n = 5). **(C)** The weight of mice in abTCR T-cell treated group (Red line),

71 Mock T-cell treated group (Grey line) and PBS treated group (Brown line) over time. **(D)** The  
 72 percentage of abTCR<sup>+</sup> to CD3<sup>+</sup> cells in peripheral blood over time. **(E)** The accumulative  
 73 expansion folds of abTCR<sup>+</sup> T cells after repeated stimulation of JVM2 cells (Green line) and  
 74 Jeko1-LMP2 cells (Red line), n = 3. Paired t test was employed. \**P* < .05, \*\**P* < .01, \*\*\**P* < .001,  
 75 \*\*\*\**P* < .0001. Mean and SE were plotted.

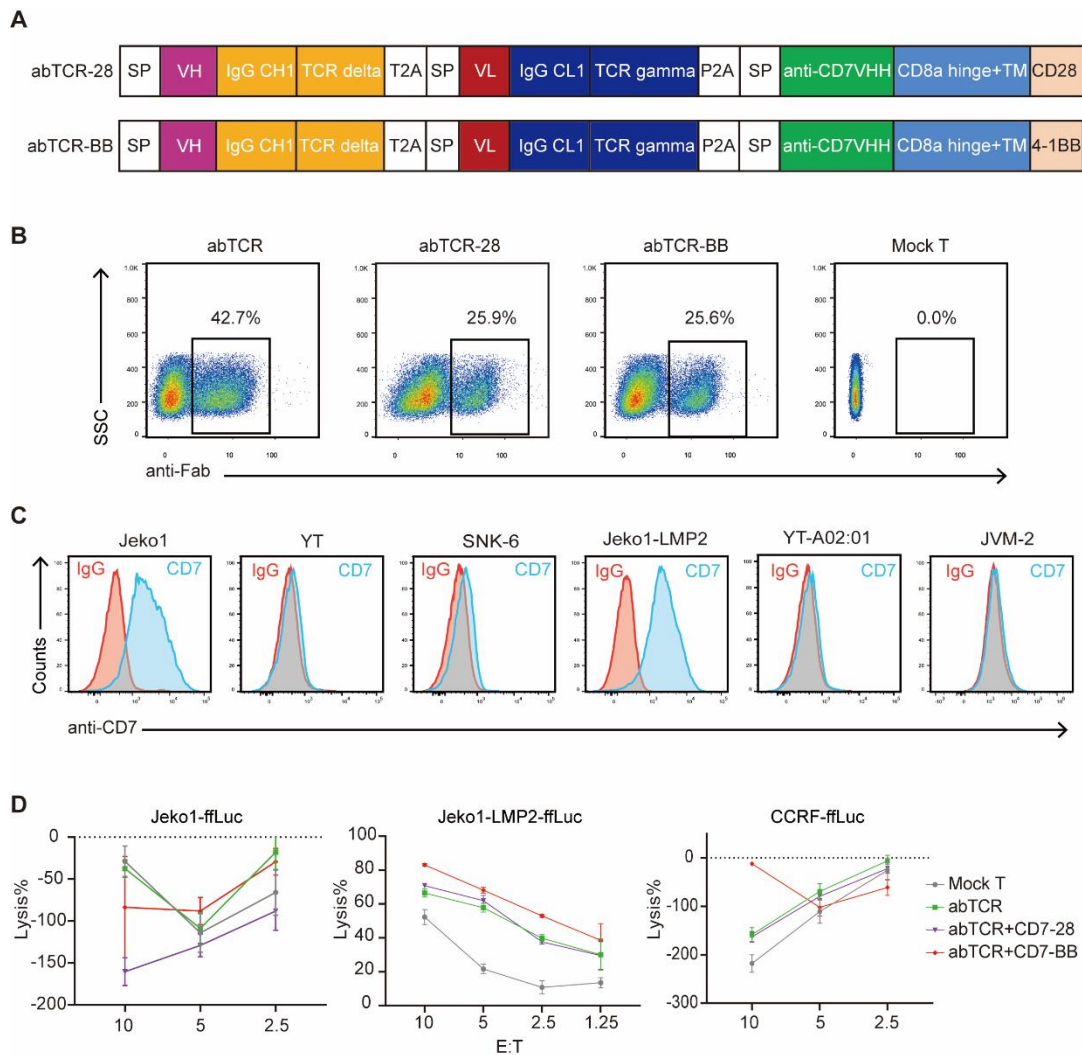

76  
 77 **Supplementary Figure 7. The optimization of abTCR.** **(A)** Construct arrangements of abTCR-  
 78 28 and abTCR-BB. Based on the transfer plasmid of abTCR, the tEGFR was replaced by a  
 79 costimulatory CAR module, consisting of an anti-CD7 VHH, the CD8 $\alpha$  hinge and transmembrane

80 domain, and either a CD28 or 4-1BB costimulatory domain. (B) The expression of abTCR/abTCR-  
 81 28/abTCR-BB on T-cell determined by flow cytometry from one representative experiment. More  
 82 than 3 times of experiments were conducted. Allophycocyanin-labeled anti-Fab antibody was used  
 83 in the detection. (C) The expression of CD7 on target cell lines. Anti-CD7 antibody was used in  
 84 the detection, and isotype anti-IgG antibody was set as control. (D) Cytolysis of abTCR, abTCR-  
 85 28 and abTCR-BB T-cells to Jeko1-ffLuc (pHLA<sup>-</sup>CD7<sup>+</sup>), Jeko1-LMP2-ffLuc (pHLA<sup>+</sup>CD7<sup>+</sup>) and  
 86 CCRF-ffLuc (pHLA<sup>-</sup>CD7<sup>+</sup>) tumor cells, three technical replicates were set. Mean and SE were  
 87 plotted.

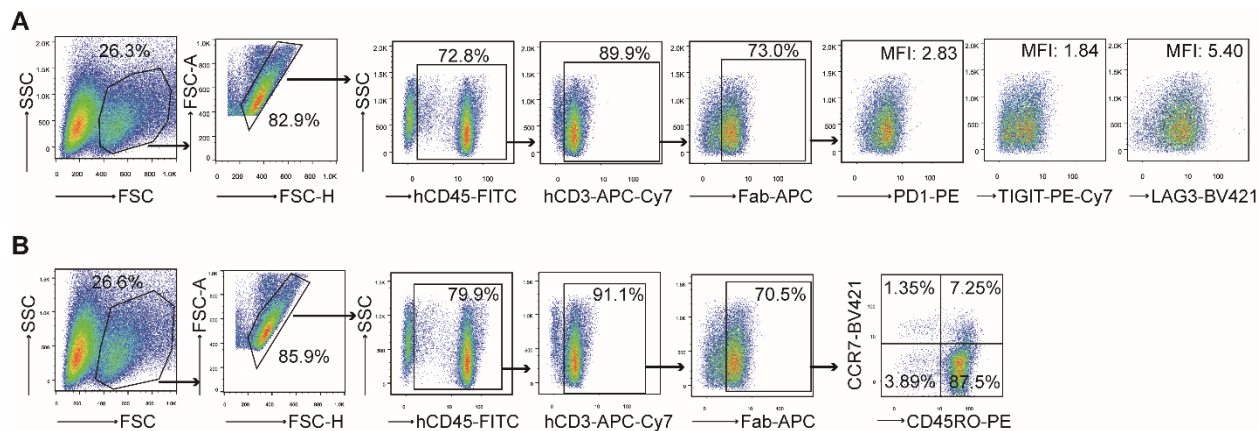

88 **Supplementary Figure 8. Representative flow cytometric gating images of Figure 5, E-G. (A)**

89 The gating processes of analyzing the MFI of PD-1, TIGIT, and LAG3 on abTCR<sup>+</sup>/CAR<sup>+</sup> T cells.

90 The percentage of abTCR<sup>+</sup>/CAR<sup>+</sup> to hCD45<sup>+</sup> cells was calculated by multiplying 73.0% and 89.9%.

91 **(B)** The gating processes of analyzing the percentage of memory subsets on abTCR<sup>+</sup>/CAR<sup>+</sup> T cells.

92 Naïve: CD45RO<sup>-</sup>CCR7<sup>+</sup>, central memory: CD45RO<sup>+</sup>CCR7<sup>+</sup>, effector memory: CD45RO<sup>+</sup>CCR7<sup>-</sup>,

93 terminally differentiated effector cells: CD45RO<sup>+</sup>CCR7<sup>+</sup>.

94

95

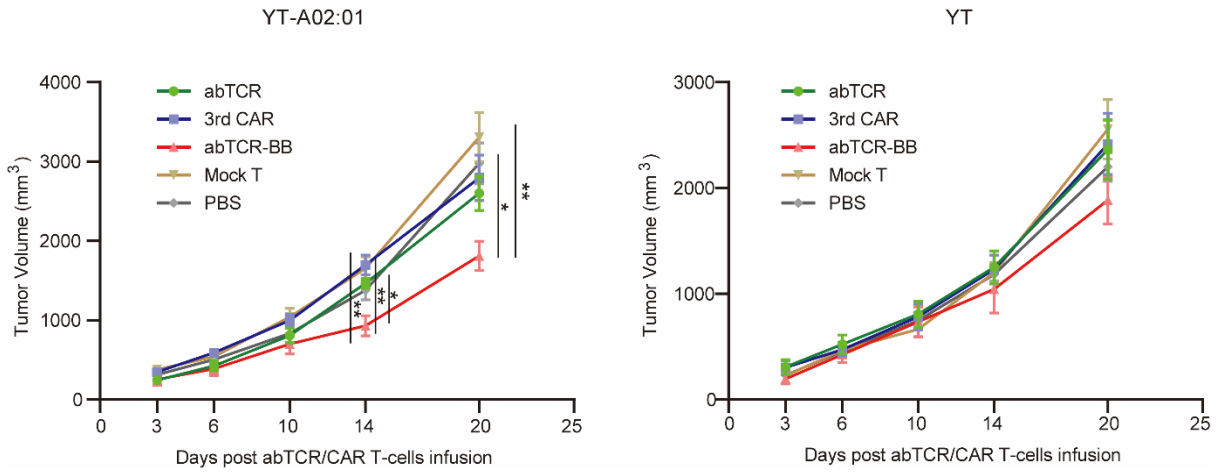

96

97 **Supplementary Figure 9.** The tumor volume of different groups in YT-A\*02:01 model (left) and  
 98 in YT model (right) over time. The mean and SE were plotted. n = 5, and one-way ANOVA with  
 99 Bonferroni's correction for multiple comparison was used. \* $P < .05$ ; \*\* $P < .01$ .

100

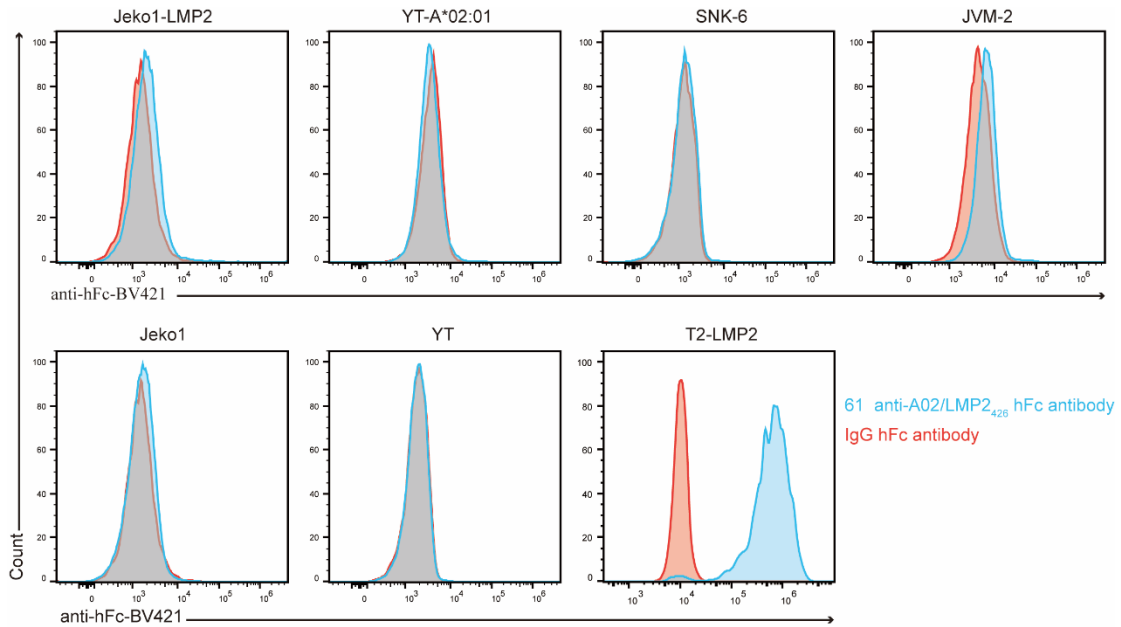

101

102 **Supplementary Figure 10. The expression of A\*02/LMP2 in the cell lines detected by FMC**  
103 **using 61 hFc antibody.** Anti-A02/LMP2 hFc antibody (Green line) or IgG hFc antibody (Red line)  
104 was used to label the targets. After wash, anti-hFc-BV421 antibody was used to detect the signal  
105 through flow cytometry. T2-LMP2 means T2 cells loaded with 50 µg LMP2<sub>426</sub> peptides.

106

107

108

109

110

111

112

113

114

115

116

117

118 **Supplementary Tables:**

**Supplementary table 1: Information of cell lines and primary cells**

| Name                    | Origin                   | HLA-A*02 | LMP2           | Culture Medium                |
|-------------------------|--------------------------|----------|----------------|-------------------------------|
| SNK6                    | NK/T cell lymphoma       | Y        | Y              | RPMI-1640 + 10%<br>FBS + IL-2 |
| YT                      | NK/T cell leukemia       | N        | Y              |                               |
| YT-A*02:01 <sup>#</sup> | NK/T cell leukemia       | Y*       | Y              |                               |
| 293T                    | Embryonic kidney         | Y        | N              |                               |
| HCT116                  | Colon                    | Y        | N              |                               |
| HEPG2                   | Liver                    | Y        | N              |                               |
| MDA-MB-468              | Breast                   | Y        | N              | DMEM + 10% FBS                |
| PANC1                   | Pancreas                 | Y        | N              |                               |
| NCI-H460                | Lung                     | Y        | N              |                               |
| OVCAR3                  | Ovary                    | Y        | N              |                               |
| T2                      | T1 transformed           | Y        | N              |                               |
| JVM2                    | EBV transformed B cells  | Y        | Y              |                               |
| RAJI                    | Burkitt lymphoma         | N        | Y              |                               |
| U266                    | Multiple myeloma         | Y        | N              |                               |
| U266-LMP2 <sup>†</sup>  | Multiple myeloma         | Y        | Y <sup>†</sup> |                               |
| Jeko1                   | Mantle cell lymphoma     | Y        | N              | RPMI-1640 + 10%<br>FBS        |
| Jeko1-LMP2 <sup>†</sup> | Mantle cell lymphoma     | Y        | Y <sup>†</sup> |                               |
| NALM6                   | Acute B cell leukemia    | Y        | N              |                               |
| BV173                   | Chronic myeloid leukemia | Y        | N              |                               |
| K562                    | Chronic myeloid leukemia | N        | N              |                               |
| THP1                    | Acute myeloid leukemia   | Y        | N              |                               |
| JURKAT                  | Acute T cell leukemia    | N        | N              |                               |
| OCI-AML3                | Acute myeloid leukemia   | Y        | N              |                               |
| PBMC                    | Primary PBMC             | Y/N      | Y/N            | RPMI-1640 + 10%<br>FBS        |

119 <sup>#</sup>: HLA-A\*02:01 was transduced into YT cells by lentivirus transfection;

120 <sup>†</sup>: LMP2<sub>426</sub> peptides was over-expressed by PresentER minigene system, which can be directly  
 121 presented by HLA-A\*02, expected to generate a high density of A\*02/LMP2 on HLA-A\*02<sup>+</sup> cell  
 122 membrane;

123 FBS: Fetal Bovine Serum; PBMC: Peripheral Blood Mononuclear Cell; Y: Yes; N: No.

124

**Supplementary Table 2. Antibodies used in this study**

| Antibodies | Fluorescence | Clone      | Company   |
|------------|--------------|------------|-----------|
| anti-EGFR  | APC          | AY13       | Biolegend |
| anti-Fab   | APC          | Polyclonal | Jackson   |
| anti-CD8   | BV421/FITC   | SK1        | Biolegend |
| CD107A     | PE-Cy7       | H4A3       | Biolegend |
| anti-PD1   | PE/APC-Cy7   | A17188A    | Biolegend |
| anti-LAG3  | BV421/PE     | 11C3C65    | Biolegend |
| anti-TIGIT | PE-Cy7       | A15153G    | Biolegend |
| CD45RO     | PE           | UCHL1      | Biolegend |
| CCR7       | BV421        | 150503     | Biolegend |
| anti-hCD45 | FITC         | HI30       | Biolegend |
| anti-hCD3  | APC-Cy7      | OKT3       | Biolegend |
| PI         | /            | /          | BD, USA   |
